# Supplementary material
Source: PubMed Central journal article supplement (PMC4865603)
Supplement: jcbn15-61st01.pdf [file jcbn15-61st01.pdf]

**Supplemental Table 1.** Accuracy studies for LC-MS/MS validated by participating in Endocrinology Proficiency Testing Program of New York State Department of Health

| Analyte                       | Sample | Your response | Target | Acceptable Range | D/Dmax | Score |
|-------------------------------|--------|---------------|--------|------------------|--------|-------|
| 25(OH)D <sub>2</sub> (nmol/L) | E01    | <5.0          | 6.3    | 0–14.0           | —      | 100   |
|                               | E02    | <5.0          | 6.8    | 0–14.3           | —      | 100   |
|                               | E03    | 31.5          | 29     | 21.3–36.5        | 0.33   | 100   |
|                               | E04    | 61.5          | 50.8   | 38.0–63.8        | 0.83   | 100   |
|                               | E05    | 92.5          | 76.5   | 57.3–95.8        | 0.83   | 100   |
| 25(OH)D <sub>3</sub> (nmol/L) | E01    | 75            | 91.5   | 68.5–114.5       | –0.72  | 100   |
|                               | E02    | 100.5         | 94.8   | 71.0–118.5       | 0.24   | 100   |
|                               | E03    | 114.8         | 104.8  | 78.5–131.0       | 0.38   | 100   |
|                               | E04    | 66.8          | 61     | 45.8–76.3        | 0.38   | 100   |
|                               | E05    | 95.3          | 88.3   | 66.3–110.5       | 0.31   | 100   |
| Total 25(OH)D (nmol/L)        | E01    | 75            | 92.5   | 69.3–115.8       | –0.75  | 100   |
|                               | E02    | 100.5         | 96.8   | 72.5–121.0       | 0.15   | 100   |
|                               | E03    | 146.3         | 134    | 100.3–167.5      | 0.37   | 10    |
|                               | E04    | 128.3         | 112.8  | 84.3–141.0       | 0.55   | 100   |
|                               | E05    | 187.8         | 167.5  | 125.5–209.5      | 0.48   | 100   |
