# Supplementary material
Source: PubMed Central journal article supplement (PMC4865603)
Supplement: jcbn15-61st02.pdf [file jcbn15-61st02.pdf]

**Supplemental Table 2.** Accuracy studies for Roche performed using a recovery test for 25(OH)D (nmol/L)

|          | Background value<br>(nmol/L, <i>n</i> = 2) | Additive concentration<br>(nmol/L) | Measured concentration<br>(nmol/L, <i>n</i> = 2) | Recovery rate<br>(%) |
|----------|--------------------------------------------|------------------------------------|--------------------------------------------------|----------------------|
| Centaur  | 36.7                                       | 52.3                               | 37                                               | 75.9                 |
|          |                                            | 315                                | 49.3                                             | 51.7                 |
| Elecsys  | 41.1                                       | 52.3                               | 41.3                                             | 82.4                 |
|          |                                            | 315                                | 56.8                                             | 62.9                 |
| LC-MS/MS | 62.9                                       | 52.3                               | 63.1                                             | 124.1                |
|          |                                            | 315                                | 86.1                                             | 93.6                 |
